# Supplementary material for: Incorporation of Fe 3+ into MnO 2 birnessite for enhanced energy storage: impact on the structure and the charge storage mechanisms
Source: Royal Society of Chemistry journal article supplement (doi:10.1039/d3ta04544g), 2024-01-01
Supplement: d3ta04544g1.pdf [file d3ta04544g1.pdf]

## Supporting Information

# Incorporation of Fe<sup>3+</sup> into MnO<sub>2</sub> birnessite towards improved energy storage: Impact on the structure and the charge storage mechanisms

Ronan Invernizzi,<sup>a</sup> Vadim M. Kovrugin,<sup>a</sup> Louise Molinié,<sup>a</sup> Antonella Iadecola,<sup>b</sup> Mathieu Duttine,<sup>a</sup> Lydie Bourgeois,<sup>c</sup> Jacob Olchowka,<sup>a,b,d\*</sup> Liliane Guerlou-Demourgues,<sup>a,b,d\*</sup>

<sup>a</sup> Univ. Bordeaux, CNRS, Bordeaux INP, ICMCB, UMR 5026, F-33600 Pessac, France

<sup>b</sup> RS2E, Réseau Français sur le Stockage Electrochimique de l'Energie, CNRS FR 3459, 80039 Amiens Cedex 1, France

<sup>c</sup> Univ. Bordeaux, CNRS, Bordeaux INP, ISM, UMR 5255, F-33400 Talence, France

<sup>d</sup> ALISTORE-ERI European Research Institute, CNRS FR 3104, 80039 Amiens Cedex 1, France

Corresponding Authors

\* [jacob.olchowka@icmcb.cnrs.fr](mailto:jacob.olchowka@icmcb.cnrs.fr)

\* [liliane.guerlou-demourgues@enscbp.fr](mailto:liliane.guerlou-demourgues@enscbp.fr)

## Part S1: Birnessite polytypes:

In total, there are 7 principally different periodic slab stacking modes in birnessite with either prismatic or octahedral interlayer environments for alkali metal cations depending on the shift of successive slabs relative to each other. Among them, it is possible to distinguish one simplest polytype with 1 layer per cell, two polytypes with 2 layers per cell, and four 3-layers polytypes<sup>1</sup> (see ref. for more details).

Moreover, the birnessite-type structures are described with either expected hexagonal (vacancy-bearing) or pseudo-hexagonal orthogonal (vacancy-free) symmetry of MnO<sub>2</sub> slabs. The latter results from the presence of a relatively higher amount of Mn<sup>3+</sup> cations in the slabs leading to a distortion of transition metal octahedra due to the Jahn-Teller effect<sup>2</sup>. Hence, each of 7 polytypes can exist in both, hexagonal or orthogonal systems, which implies a doubling of the number of possible birnessite structures.

Given an ideal classic brucite-like slab made up of edge-shared MnO<sub>2</sub> octahedra, its structure naturally aligns with hexagonal 'honeycomb' symmetry. However, with the introduction of Mn<sup>3+</sup> cations, distortions in the manganese octahedra and vacancies may arise. As a consequence, while the MnO<sub>2</sub> slab might still appear hexagonal to the eye, its precise symmetry decreases, causing the layer to adopt an orthogonal symmetry. Hence, the term "pseudo-hexagonal" symmetry is used to describe its real orthogonal symmetry – but it's used in a purely visual descriptive sense. Refer to the figure below for clarity.

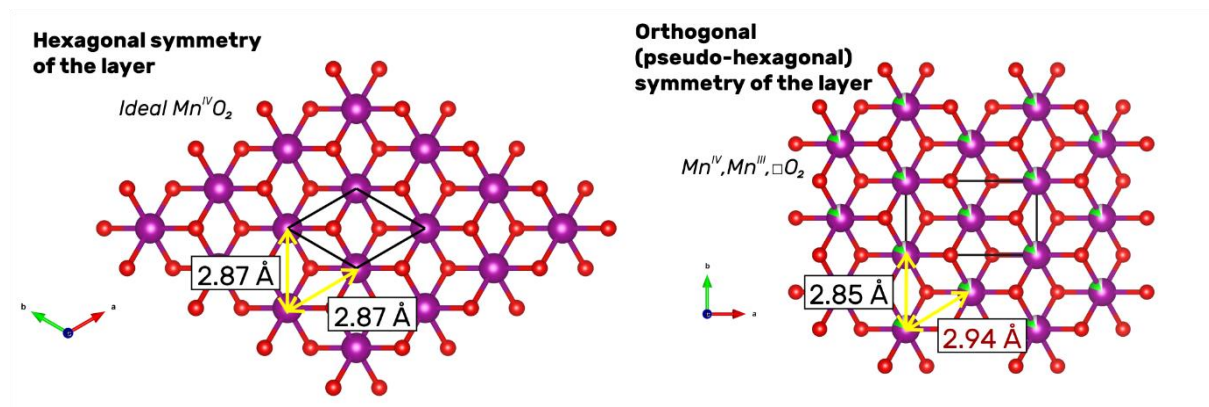

When analyzing the full symmetry of the birnessite structure, which includes both the symmetry of the slabs and the interlayer, various descriptions from literature point to different possible space groups: hexagonal (e.g., P63/mmc), orthorhombic (e.g., Ccmm), monoclinic (e.g., C2/m), and triclinic (e.g., P-1) space groups.

Finally, the description of these structures is rather complicated and confusing in the literature since there are two nomenclatures used for a classification of the polytypes so far: the traditional mineralogical Ramsdell system<sup>3</sup> used by Drits *et al*<sup>1</sup> based on the symmetry of the MnO<sub>2</sub> slabs, and the alternative

notation based on the interlayer type usually used by material scientists originally introduced by Delmas *et al.* <sup>4</sup>.

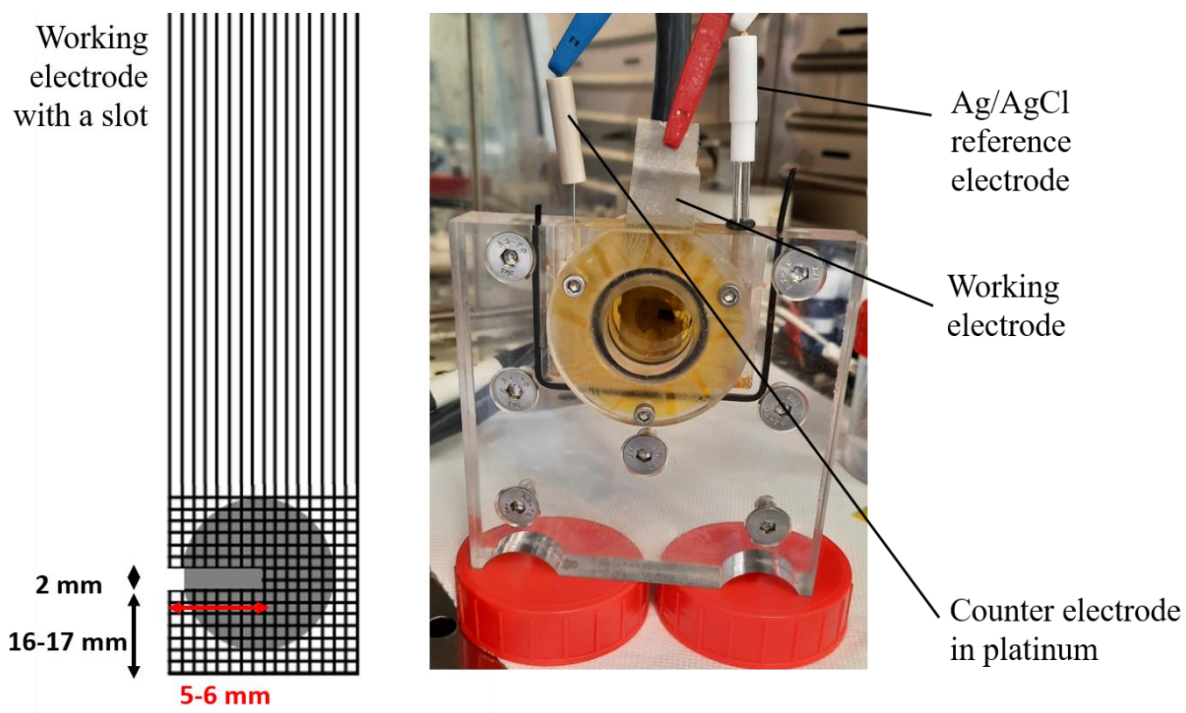

Figure S1: Operando cell from IMN (Nantes) used for operando XAS at ROCK beamline.

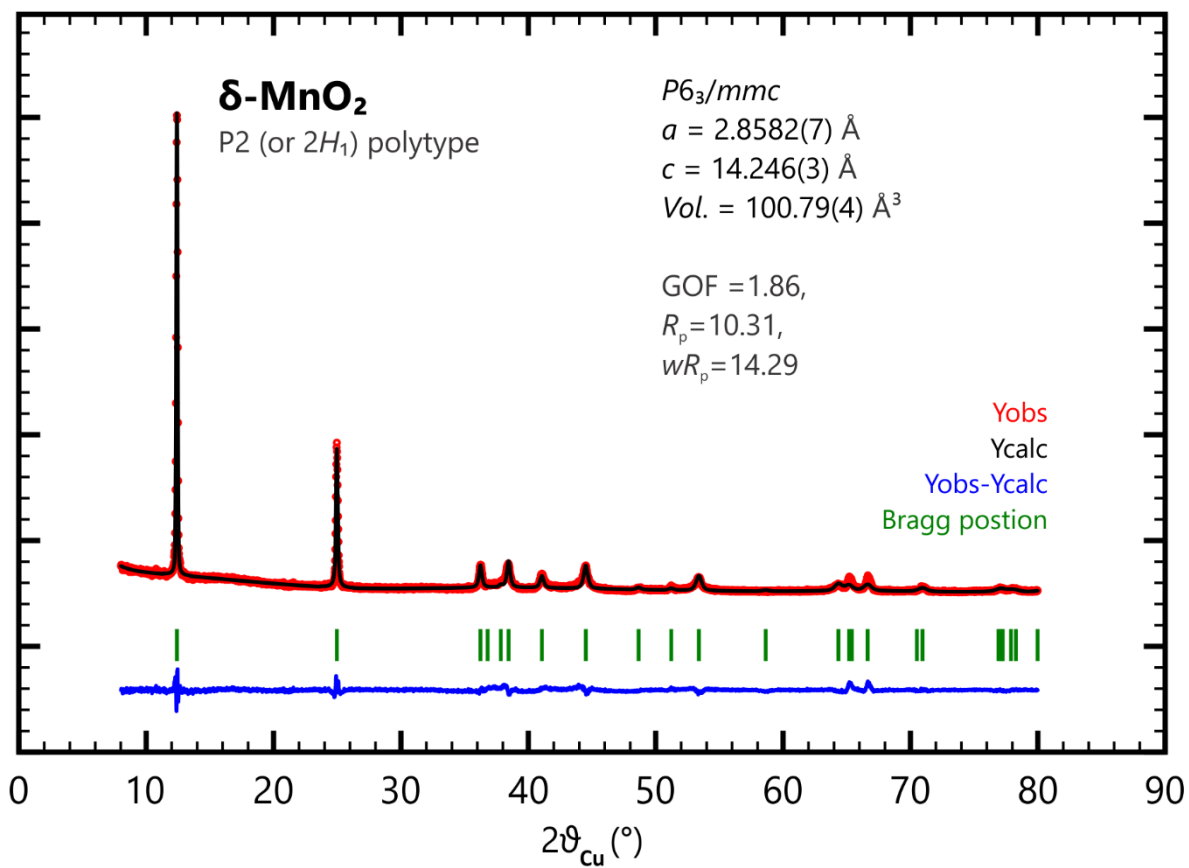

Figure S2: Results of the Rietveld refinement of the crystal structure of  $\delta$ -MnO<sub>2</sub>. Mineralogical polytype notation is given brackets.

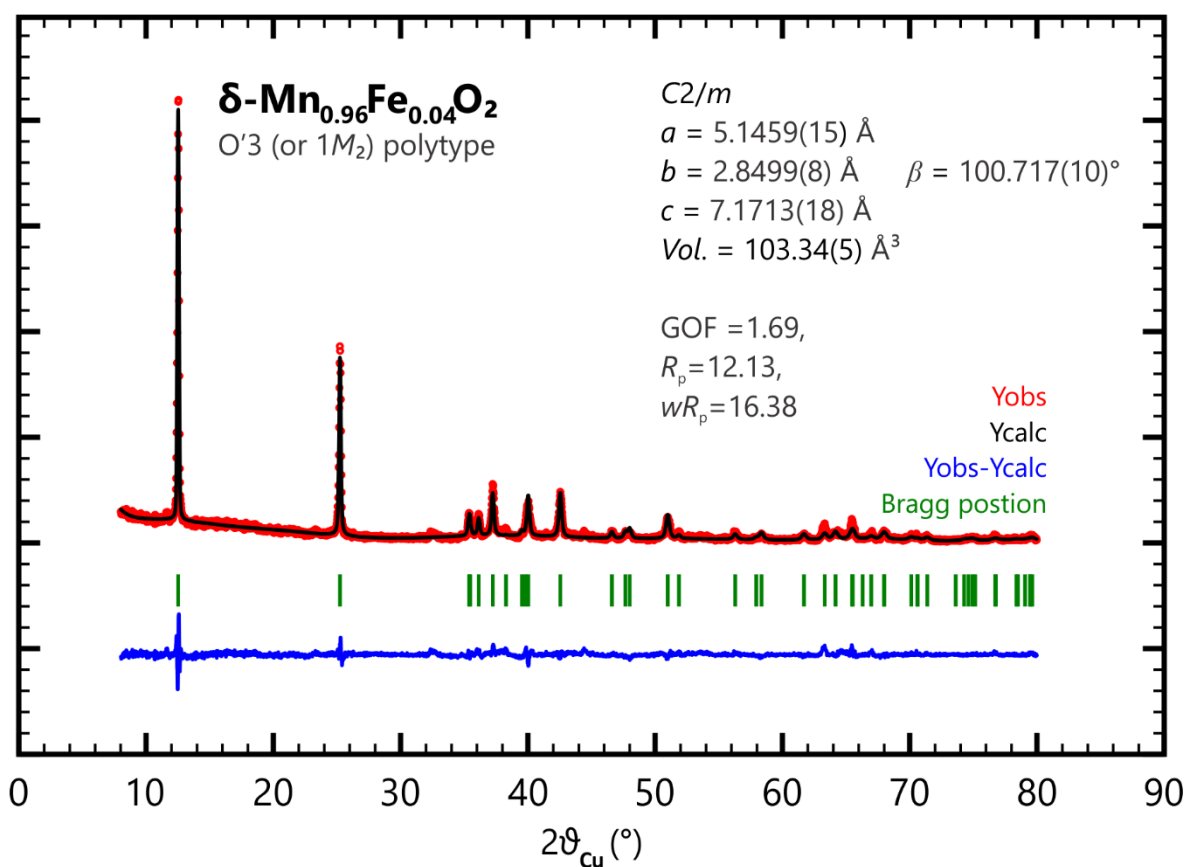

Figure S3: Results of the Rietveld refinement of the crystal structure of  $\delta\text{-Mn}_{0.96}\text{Fe}_{0.04}\text{O}_2$ . Mineralogical polytype notation is given brackets.

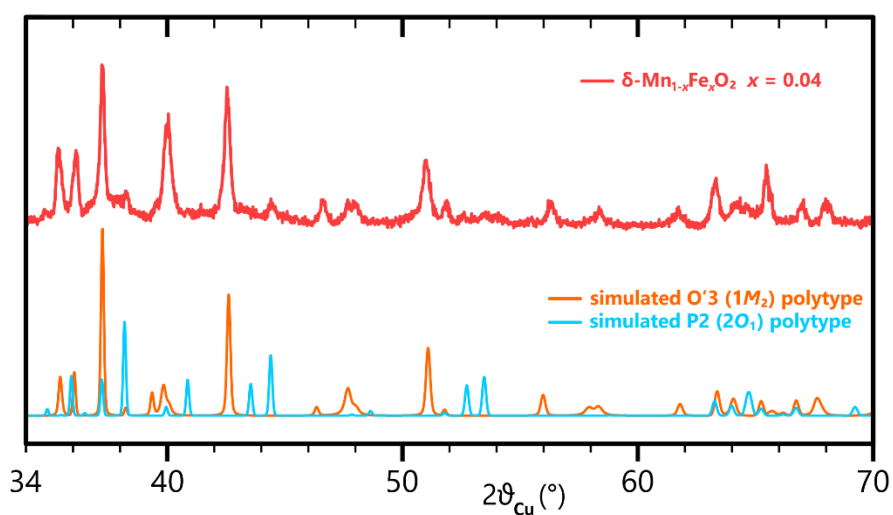

Figure S4: (Top) Powder XRD patterns of  $\delta\text{-Mn}_{1-x}\text{Fe}_x\text{O}_2$ ,  $x = 0.04$  (red). (Bottom) Simulated XRD patterns corresponding to idealized birnessite polytypes O'3 (orange) and P2 (light blue).

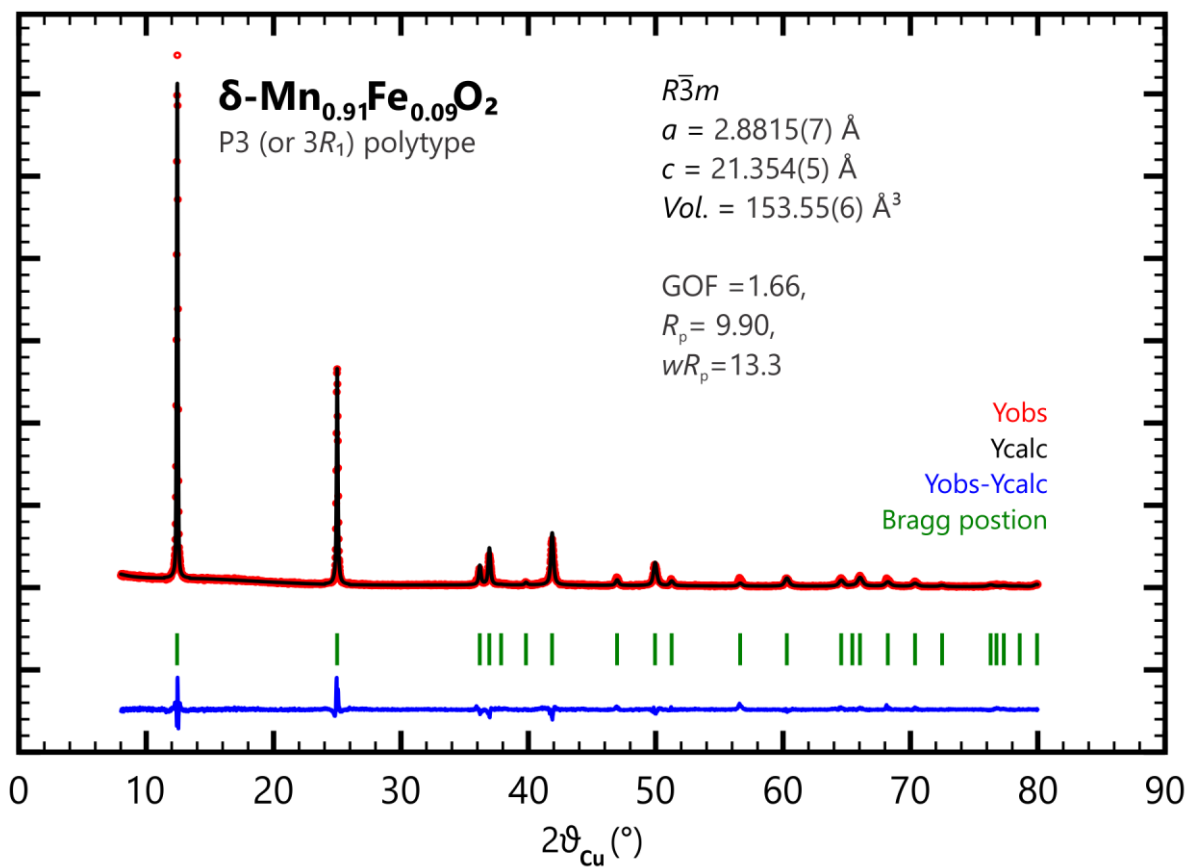

Figure S5: Results of the Rietveld refinement of the crystal structure of  $\delta\text{-Mn}_{0.91}\text{Fe}_{0.09}\text{O}_2$ . Mineralogical polytype notation is given brackets.

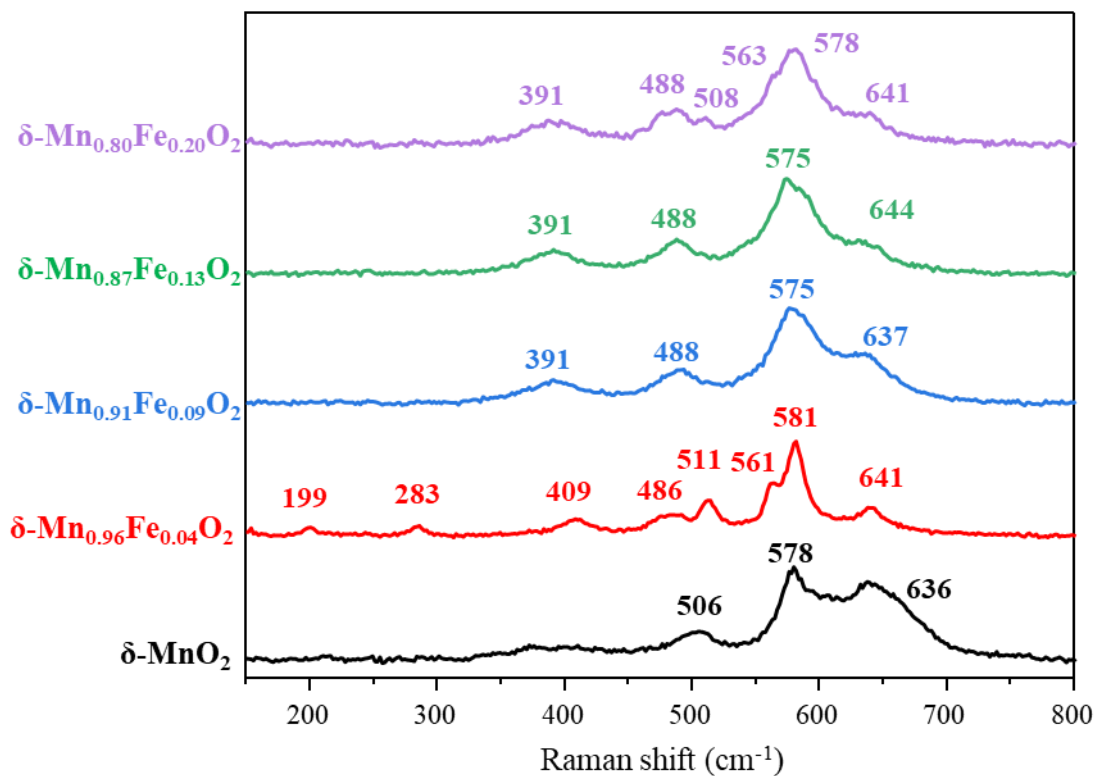

Figure S6: Raman spectra of the series of iron-birnessites  $\delta\text{-MnO}_2$  (black curve),  $\delta\text{-Mn}_{0.96}\text{Fe}_{0.04}\text{O}_2$  (red curve),  $\delta\text{-Mn}_{0.91}\text{Fe}_{0.09}\text{O}_2$  (blue curve),  $\delta\text{-Mn}_{0.87}\text{Fe}_{0.13}\text{O}_2$  (green curve) and  $\delta\text{-Mn}_{0.80}\text{Fe}_{0.20}\text{O}_2$  (purple curve).

Raman scattering measurements were performed with a Horiba Jobin Yvon Labram HR-800 micro-spectrometer, using a 514.5 nm excitation wavelength and a power adjusted to ca. 50  $\mu\text{W}$ .

Raman spectra confirm the change of symmetry depending on the iron content within the birnessite-type phase.

The spectrum of  $\delta\text{-MnO}_2$  (black curve) displays three bands at 506, 578 and 636  $\text{cm}^{-1}$  that are typical for a birnessite with a hexagonal symmetry and can be attributed to the stretching and bending of  $[\text{MnO}_6]$ . The overlapping of several bands between 550  $\text{cm}^{-1}$  and 700  $\text{cm}^{-1}$  leading to a broad signal is most probably induced by the presence of interlayer  $\text{Mn}^{3+}$  and thus, different Mn environments.

The symmetry lowering for  $\delta\text{-Mn}_{0.96}\text{Fe}_{0.04}\text{O}_2$  (red curve) can clearly be observed with the apparition of several new bands and perfectly correlates the structural refinement in the monoclinic system.

Finally, the spectra of  $\delta\text{-Mn}_{0.91}\text{Fe}_{0.09}\text{O}_2$  (blue curve),  $\delta\text{-Mn}_{0.87}\text{Fe}_{0.13}\text{O}_2$  (green curve) and  $\delta\text{-Mn}_{0.80}\text{Fe}_{0.20}\text{O}_2$  (purple curve) are similar and display the main peaks at 488  $\text{cm}^{-1}$ , 575  $\text{cm}^{-1}$  and ca. 640  $\text{cm}^{-1}$  that correspond to the stretching and bending vibration modes of  $[\text{MnO}_6]$ , in perfect agreement with a hexagonal birnessite reported by Osaka et al.<sup>5</sup>. Besides, the additional peaks observed for  $\delta\text{-Mn}_{0.80}\text{Fe}_{0.20}\text{O}_2$  (i.e at 508  $\text{cm}^{-1}$ ) fits with the presence of an additional  $\text{O}'_3$  phase observed by diffraction.

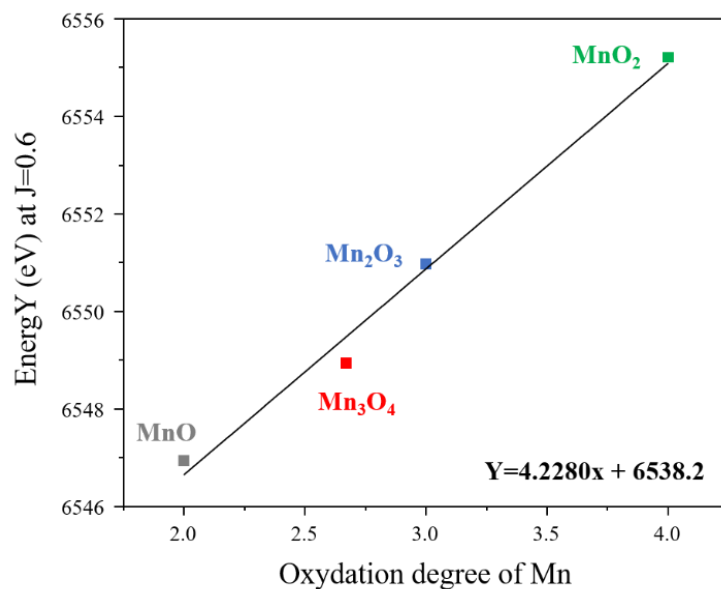

Figure S7: Dependence between the oxidation degree of manganese for the reference materials ( $MnO$ ,  $Mn_3O_4$ ,  $Mn_2O_3$  and  $MnO_2$ ) and the threshold energy value at  $J=0.7$  ( $Y= 4.2368 X + 6539.2$ ). An energy of 6554.50 eV is found for  $\delta$ - $Mn_{0.96}Fe_{0.04}O_2$  and 6554.75 eV for all the P-type birnessites, leading to average Mn oxidation state of 3.61 and 3.67 respectively.



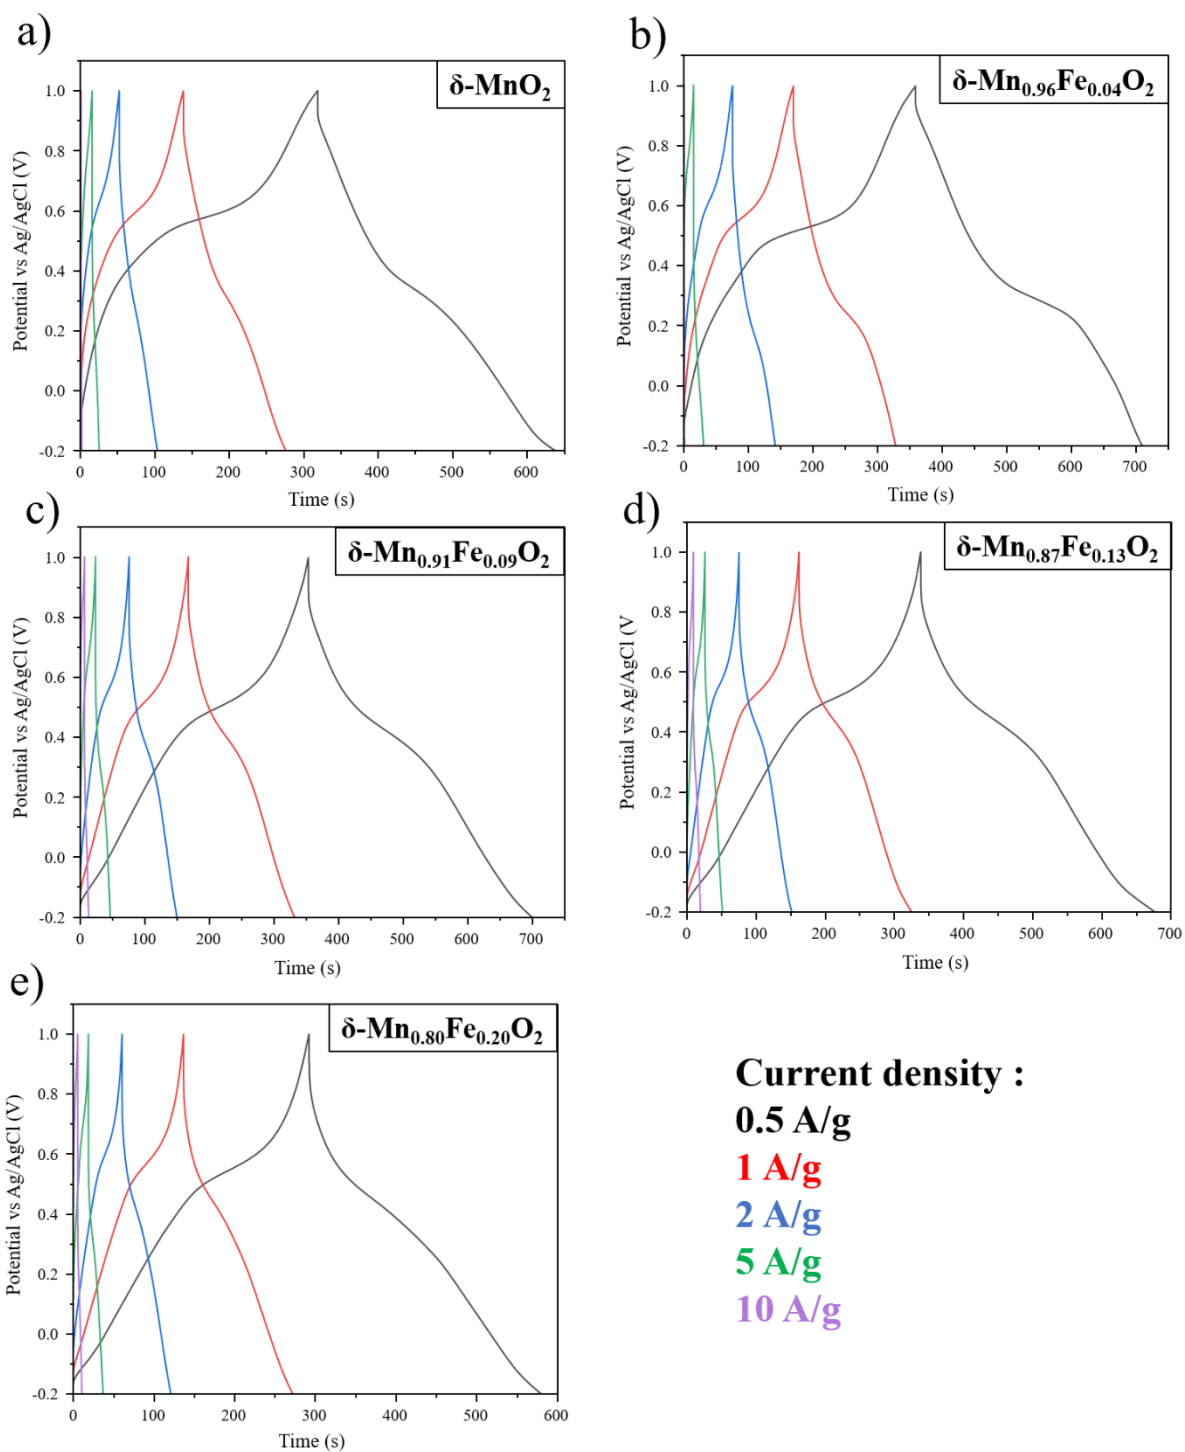

Figure S8: Galvanostatic charge-discharge curves from 0.5 A/g to 10 A/g in 0.5M K<sub>2</sub>SO<sub>4</sub>. When the current density increases to 10 A/g, the profile becomes a line which demonstrates the limited alkaline diffusion involved in the energy storage reactions.

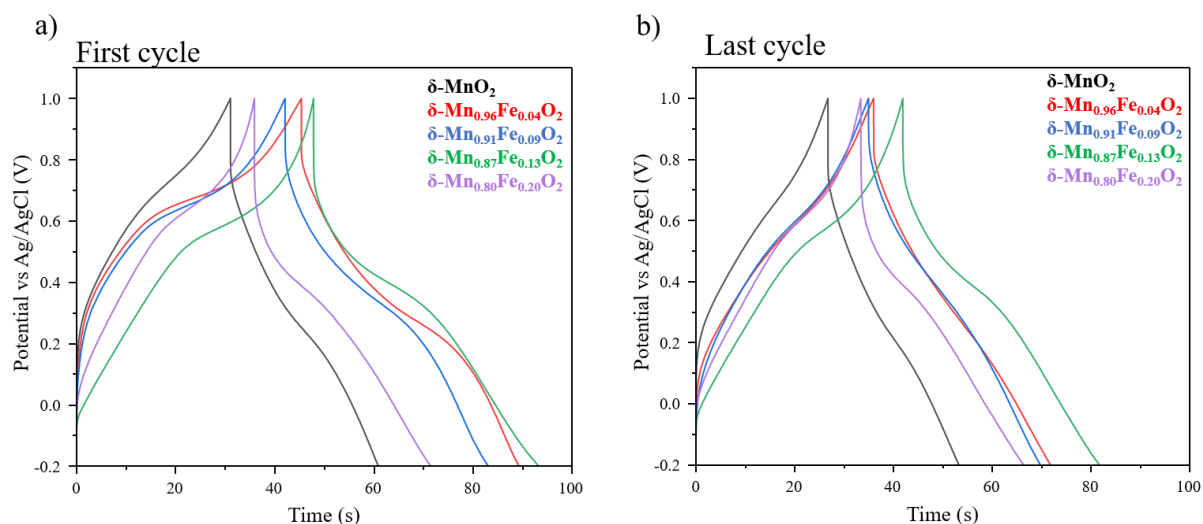

Figure S9: Galvanostatic charge-discharge in 0.5M  $K_2SO_4$  at 3 A/g of the series of samples. The graph a) reports the first cycle while the graph b) the 5000th cycle.

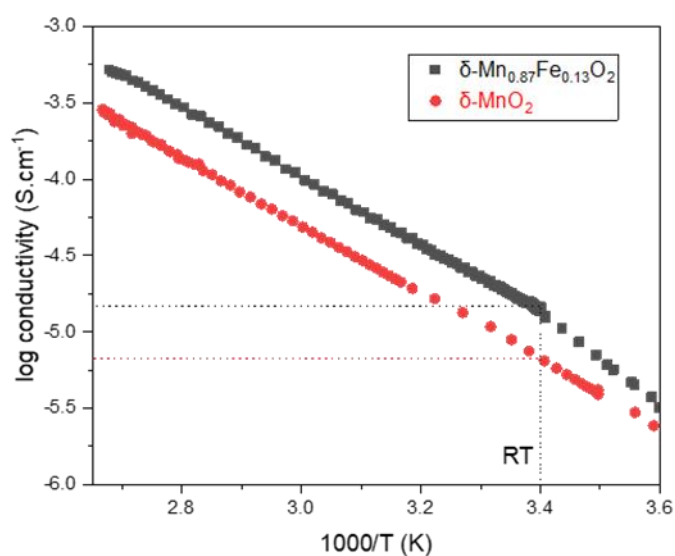

Figure S10: Comparison of the electrical conductivity versus temperature using the 4-point probe Method. The measurements were performed on pellets that were prepared by pressing the birnessite polycrystalline sample at 5 tons.

To compare the conductivity between  $\delta\text{-MnO}_2$  and  $\delta\text{-Mn}_{1-x}\text{Fe}_x\text{O}_2$  we performed 4-probe measurements. The figure above compares the conductivity versus temperature of  $\delta\text{-MnO}_2$  and  $\delta\text{-Mn}_{0.87}\text{Fe}_{0.13}\text{O}_2$ . The data show that the RT electrical conductivity is improved in the presence of Fe in the metal oxide layer.

*Table S1: Chemical compositions of the different materials, determined by combining ICP-OES, CHNS, Mössbauer and XAS. The values obtained from the Rietveld refinement of the structural data are italicized in the respective cells below.*

| Sample                                                             | % K<br>(mass.) | % Fe<br>(mass.) | % Mn<br>(mass.) | Atomic ratio<br>K/(Mn+Fe)<br><i>[from str.]</i> | Oxyda<br>tion<br>degree<br>of Mn | Chemical formula                                                                                                                                                                                                                                                                                       |
|--------------------------------------------------------------------|----------------|-----------------|-----------------|-------------------------------------------------|----------------------------------|--------------------------------------------------------------------------------------------------------------------------------------------------------------------------------------------------------------------------------------------------------------------------------------------------------|
| $\delta$ -MnO <sub>2</sub>                                         | 10.1           | /               | 45.1            | 0.30<br><i>[0.32]</i>                           | 3.67                             | $\text{H}_{0.03^+}\text{K}_{0.30^+}(\text{H}_2\text{O})_{0.32}\text{Mn}^{3.67^+}\text{O}_2 /$<br><i><math>[\text{K}_{0.300}\text{Mn}^{3^+}_{0.063}(\text{H}_2\text{O})_{0.74}]\{\text{Mn}^{4^+}_{0.878}\square_{0.122}\text{O}_2\}</math></i>                                                          |
| $\delta$ -<br>Mn <sub>0.96</sub> Fe <sub>0.04</sub> O <sub>2</sub> | 10.4           | 1.8             | 42.9            | 0.34<br><i>[0.32]</i>                           | 3.61                             | $\text{H}_{0.07^+}\text{K}_{0.34^+}(\text{H}_2\text{O})_{0.28}[\text{Fe}_{0.04^{3^+}}\text{Mn}_{0.96^{3.61^+}}\text{O}_2] /$<br><i><math>[\text{K}_{0.324}(\text{H}_2\text{O})_{1.05}]\{\text{Fe}^{3^+}_{0.039}(\text{Mn}^{3^+}_{0.285},\text{Mn}^{4^+}_{0.676})_{\Sigma=0.961}\text{O}_2\}</math></i> |
| $\delta$ -<br>Mn <sub>0.91</sub> Fe <sub>0.09</sub> O <sub>2</sub> | 7.3            | 4.4             | 43.7            | 0.23<br><i>[0.21]</i>                           | 3.67                             | $\text{H}_{0.16^+}\text{K}_{0.23^+}(\text{H}_2\text{O})_{0.32}[\text{Fe}_{0.09^{3^+}}\text{Mn}_{0.91^{3.67^+}}\text{O}_2] /$<br><i><math>[\text{K}_{0.213}(\text{H}_2\text{O})_{1.04}]\{\text{Fe}^{3^+}_{0.09}(\text{Mn}^{3^+}_{0.123},\text{Mn}^{4^+}_{0.787})_{\Sigma=0.91}\text{O}_2\}</math></i>   |
| $\delta$ -<br>Mn <sub>0.87</sub> Fe <sub>0.13</sub> O <sub>2</sub> | 7.4            | 6.4             | 42.3            | 0.22                                            | 3.67                             | $\text{H}_{0.20^+}\text{K}_{0.22^+}(\text{H}_2\text{O})_{0.26}[\text{Fe}_{0.13^{3^+}}\text{Mn}_{0.87^{3.67^+}}\text{O}_2]$                                                                                                                                                                             |
| $\delta$ -<br>Mn <sub>0.80</sub> Fe <sub>0.20</sub> O <sub>2</sub> | 9.2            | 8.5             | 35.4            | 0.29                                            | 3.67                             | $\text{H}_{0.17^+}\text{K}_{0.29^+}(\text{H}_2\text{O})_{0.24}[\text{Fe}_{0.20^{3^+}}\text{Mn}_{0.80^{3.67^+}}\text{O}_2]$                                                                                                                                                                             |

Based on the results of ICP-OES and CHNS analyses and the oxidation degree of the transition metal determined by <sup>57</sup>Fe Mössbauer and X-ray adsorption spectroscopy (see below), the synthesized materials can be described by precise chemical formulae listed in Table S1, which are in general agreement with the structural formulae resulting from the Rietveld refinement.

Table S2: Fractional atomic coordinates and equivalent isotropic displacement parameters for  $K_{0.300} Mn^{III}_{0.063}(Mn^{IV}_{0.878} \square_{0.122} O_2) \cdot 0.74(H_2O)$  (or  $\delta$ - $MnO_2$ ).

| Atome | Wyckoff site | x          | y         | z          | $U_{iso}^*/U_{eq}$ | Occ. (<1)  |
|-------|--------------|------------|-----------|------------|--------------------|------------|
| Mn1   | 2a           | 0          | 0         | 0          | 0.004 (3)*         | 0.878      |
| O1    | 4f           | 0.666667   | 0.333333  | 0.0513 (5) | 0.0274*            |            |
| K1    | 6h           | 0.222 (7)  | 0.778 (7) | 0.25       | 0.0991*            | 0.0999     |
| Mn2   | 4e           | 0          | 0         | 0.160(4)   | 0.21 (19)*         | 0.0315     |
| O2    | 2c           | 0.333333   | 0.666667  | 0.25       | 0.0835*            | 0.245 (18) |
| O3    | 6h           | 0.175 (15) | 0.088 (8) | 0.25       | 0.047*             | 0.1652     |

Table S3: Fractional atomic coordinates and equivalent isotropic displacement parameters for  $K_{0.324}(Fe^{III}_{0.039}Mn^{III,IV}_{0.961}O_2) \cdot 1.05(H_2O)$  (or  $\delta$ - $Mn_{0.96}Fe_{0.04}O_2$ ).

| Atome | Wyck. | x           | y | z           | $U_{iso}^*/U_{eq}$ | Occ. (<1)  |
|-------|-------|-------------|---|-------------|--------------------|------------|
| Mn1   | 2a    | 0.0864*     | 0 | 0           | 0.045 (8)*         | 0.961      |
| Fe1   | 2a    | 0           | 0 | 0           | 0.045 (8)*         | 0.039      |
| O1    | 4i    | 0.3634 (16) | 0 | 0.1293 (12) | 0.046 (8)*         |            |
| O3    | 2c    | 0           | 0 | 0.5         | 0.0982*            | 0.27 (3)   |
| K1    | 4i    | -0.269497   | 0 | 0.505106    | 0.0864*            | 0.162      |
| O2    | 4i    | -0.264 (7)  | 0 | 0.514 (4)   | 0.0864*            | 0.392 (17) |

Table S4: Fractional atomic coordinates and equivalent isotropic displacement parameters for  $K_{0.213}(Fe^{III}_{0.09}Mn^{III,IV}_{0.91}O_2) \cdot 1.04(H_2O)$  (or  $\delta$ - $Mn_{0.91}Fe_{0.09}O_2$ ).

| Atome | Wyckoff site | x         | y           | z           | $U_{iso}^*/U_{eq}$ | Occ. (<1) |
|-------|--------------|-----------|-------------|-------------|--------------------|-----------|
| Mn1   | 3a           | 0         | 0           | 0           | 0.2 (5)*           | 0.91      |
| Fe1   | 3a           | 0         | 0           | 0           | 0.2 (5)*           | 0.09      |
| O1    | 6c           | 0.666667  | 0.333333    | -0.0398 (2) | 0.1 (5)*           |           |
| O2    | 18h          | 0.296 (3) | 0.1480 (14) | -0.16513    | 0.0 (5)*           | 0.173 (2) |
| K1    | 18h          | 0.13 (2)  | 0.066 (10)  | -0.16513    | 0.0 (5)*           | 0.0355    |

## **References:**

- (1) Drits, V. A.; Lanson, B.; Gaillot, A.-C. Birnessite Polytype Systematics and Identification by Powder X-Ray Diffraction. *Am. Mineral.* 2007, **92** (5–6), 771–788.  
<https://doi.org/10.2138/am.2007.2207>.
- (2) Drits, V. A.; Silvester, E.; Gorshkov, A. I.; Manceau, A. Structure of Synthetic Monoclinic Na-Rich Birnessite and Hexagonal Birnessite: I. Results from X-Ray Diffraction and Selected-Area Electron Diffraction. *Am. Mineral* 1997, **82** (9–10), 946–961.
- (3) Ramsdell, L. S. Studies on Silicon Carbide. *Am. Mineral.* 1947, **32** (1–2), 64–82.
- (4) Delmas, C.; Fouassier, C.; Hagenmuller, P. Structural Classification and Properties of the Layered Oxides. *Physica B+C* 1980, **99** (1–4), 81–85.  
[https://doi.org/10.1016/0378-4363\(80\)90214-4](https://doi.org/10.1016/0378-4363(80)90214-4).
- (5) Ogata, A.; Komaba, S.; Baddour-Hadjean, R. Doping Effects on Structure and Electrode Performance of K-Birnessite-Type Manganese Dioxides for Rechargeable Lithium Battery. *Electrochimica Acta* 2008, **53**, 3084–3093.  
<https://doi.org/10.1016/j.electacta.2007.11.038>
